# Supplementary material for: Effect of Epinephrine Administered during Cardiopulmonary Resuscitation on Cerebral Oxygenation after Restoration of Spontaneous Circulation in a Swine Model with a Clinically Relevant Duration of Untreated Cardiac Arrest
Source: Int J Environ Res Public Health. 2021 May 31;18(11):5896. doi: 10.3390/ijerph18115896 (PMC8198967; doi:10.3390/ijerph18115896)
Supplement: Supplementary file 1 [file ijerph-18-05896-s001.zip › File S1.xlsx]

## Sheet: Data
No	Weight (kg)	Systolic arterial pressure_baseline (mmHg)	Diastolic arterial pressure_baseline (mmHg)	Mean arterial pressure_baseline (mmHg)	Systolic right atrial pressure_baseline (mmHg)	Diastolic right atrial pressure_baseline (mmHg)	Mean right atrial pressure_baseline (mmHg)	Heart rate_baseline (/min)	End-tidal CO2_baseline (mmHg)	Rectal temperature_baseline (degree Celsius)	Arterial pH_baseline	PaCO2_baseline (mmHg)	PaO2_baseline (mmHg)	Arterial lactate_baseline (mmol/l)	SaO2_baseline (%)	Jugular venous pH_baseline	PjvCO2_baseline (mmHg)	PjvO2_baseline (mmHg)	Jugular venous lactate_baseline (mmol/l)	SjvO2_baseline (%)	Cerebral O2 extraction fraction_baseline (%)	PbtO2 at FiO2 0.3_baseline (torr)	PbtO2 at FiO2 1.0_baseline (torr)	Microvascular flow index_baseline	Number of perfused capillaries_baseline (n)	Group (1: Saline, 2: Epinephrine)	ROSC (1: Yes, 2: No)	Number of epinephrine dose	Duration of CPR (min)	Duration of PbtO2 <20 torr	PbtO2 <20 torr (1: Yes, 2: No)	PjvO2-PtO2_baseline (mmHg)	(PjvCO2 – PaCO2)/(arterial O2 content – jugular venous O2 content)_baseline	Jugular venous lactate – arterial lactate_baseline (mmol/l)	Lactate oxygen index_baseline
1	24.06	101	67	86	8	3	5	86	39	37.5	7.52	38	155	0.9	100	7.42	51	42	1.1	79	23.1192	35.24	71.88	3	13	2	1	1	2	39	1	6.76	4.77804	0.2	0.0735083
2	24.1	122	87	103	7	4	6	87	37	37.9	7.49	41	130	0.8	99	7.4	52	40	1.1	75	25.8649	32.56	73.69	3	16	1	1	0	3	0	2	7.44	3.80596	0.3	0.103799
3	25.8	114	72	91	8	4	6	98	39	38	7.55	39	165	0.9	100	7.46	48	37	0.8	74	28.4945	40.34	83.61	3	16	2	1	1	2	0	2	-3.34	2.98662	-0.1	-0.0331847
4	23.7	126	91	109	13	8	11	133	42	37.7	7.46	48	116	0.9	99	7.45	50	64	1	93	7.52571	33.18	86.12	3	10	1	2	0	12			30.82	2.79298	0.1	0.139649
5	27.6	145	100	118	14	7	11	103	40	38	7.49	44	129	0.7	99	7.4	57	34	1	65	35.86	36.65	91.56	3	11	1	1	0	4	0	2	-2.65	3.49814	0.3	0.0807263
6	23.2	118	69	90	10	4	7	80	40	37.5	7.53	46	186	0.6	100	7.4	68	29	1.2	55	46.7729	37.11	91.12	3	14	1	2	0	12			-8.11	3.66991	0.6	0.100088
7	23.14	117	88	101	10	6	8	120	36	36.3	7.48	42	184	1.1	100	7.42	49	44	1.3	81	21.8438	33.52	65.23	3	9	1	1	0	4	0	2	10.48	2.79866	0.2	0.0799616
8	23.2	130	106	117	11	5	8	91	40	36.1	7.43	47	167	1.2	99	7.27	67	24	2.6	33	67.5575	28.1	55.69	3	14	1	2	0	12			-4.1	2.68652	1.4	0.188056
9	36.5	128	84	105	10	4	7	75	35	36.4	7.49	41	186	0.6	100	7.43	50	49	1	85	17.584	33.77	85.06	3	12	2	1	1	3	0	2	15.23	3.91049	0.4	0.1738
10	27.1	119	79	100	10	4	6	71	36	36.3	7.5	44	176	1	100	7.45	52	61	1.2	92	10.9871	42.7	97.4	3	8	2	1	3	7	40	1	18.3	6.95205	0.2	0.173801
11	23.2	101	60	77	8	4	6	57	32	36	7.53	41	231	0.9	100	7.52	42	100	0.9	98	4.84472	25.41	46.51	3	8	1	1	0	2	0	2	74.59	1.49876	0	0
12	23.9	134	107	121	8	3	5	119	39	38	7.54	41	165	1.1	100	7.44	55	31	1.7	63	38.7926	41.03	103	3	11	2	1	1	2	0	2	-10.03	2.86072	0.6	0.122602
13	22.8	114	76	93	7	6	6	79	41	36.8	7.57	42	203	1.1	100	7.45	60	24	1.8	46	55.914	29.75	60.94	3	11	1	1	0	2	0	2	-5.75	2.86477	0.7	0.111408
14	23.9	155	112	131	7	3	4	90	40	37	7.51	41	209	1.5	100	7.42	50	35	3.1	69	33.8364	27.15	62.24	3	13	2	1	1	2	0	2	7.85	2.22845	1.6	0.396169
15	23.5	111	67	89	13	7	10	77	40	36.3	7.5	48	143	1.3	99	7.43	59	37	1.6	72	29.1028	30.25	57.08	3	16	2	1	1	2	0	2	6.75	3.33039	0.3	0.0908287
16	21.94	147	84	103	9	3	6	91	38	38	7.5	42	131	0.6	99	7.46	45	51	0.8	88	12.8629	27.67	78.75	3	18	2	1	2	4	29	1	23.33	2.01386	0.2	0.134257
17	21.5	144	100	120	10	8	9	97	42	38	7.48	44	136	0.7	99	7.45	49	56	0.8	90	10.6308	21.03	81.18	3	8	1	1	0	4	5	1	34.97	3.45418	0.1	0.0690837
18	22.2	123	87	104	8	4	6	85	39	36.7	7.5	42	217	1	100	7.43	50	51	1.2	87	16.8801	33.2	77.95	3	11	1	1	0	4	0	2	17.8	4.30506	0.2	0.107626
19	23.9	148	98	119	10	3	6	77	35	37.8	7.54	38	166	1.1	100	7.52	40	81	1.2	97	4.74071	29.35	92.77	3	8	2	1	1	2	43	1	51.65	2.96042	0.1	0.148021
20	22.8	148	99	119	13	5	8	82	37	37.8	7.56	34	213	1.4	100	7.53	37	78	1.6	97	5.82273	41.4	108.5	3	13	1	1	0	4	9	1	36.6	3.64777	0.2	0.243185
21	25.9	121	77	95	9	7	8	90	38	37.9	7.56	39	226	1.1	100	7.49	48	46	1.4	85	18.3252	25.01	51.61	3	15	2	1	2	4	44	1	20.99	3.60577	0.3	0.120192
22	25	117	74	91	12	9	11	86	40	38.6	7.54	39	168	1	100	7.45	52	41	1.3	79	23.7939	42.8	80.55	3	11	2	1	1	2	0	2	-1.8	5.36866	0.3	0.123892
23	25.1	135	80	101	12	7	9	91	40	37.9	7.49	41	158	1.2	100	7.37	59	37	1.8	69	33.0118	27.64	52.68	3	9	1	2	0	12			9.36	4.91323	0.6	0.163774

## Sheet: CPP during CPR
No	Group (1: Saline, 2: Epinephrine)	7	8	9
1	2	1.7	9.54	19.06
2	1	1.3	4.86	12.94
3	2	0.5	16.48	14.52
4	1	0.1	1.38	3.98
5	1	0.7	3.5	5.1
6	1	0.8	1.8	0.07
7	1	0	7.28	9.52
8	1	0	-0.76	1.6
9	2	0	6.46	11.88
10	2	0	1.05	3.14
11	1	0.9	5.66	14.62
12	2	0	7.46	13.7
13	1	0.1	12.85	16.8
14	2	0.1	13.64	13.92
15	2	0.1	15.58	18.94
16	2	0	4.68	4.42
17	1	0.1	3.36	10.06
18	1	0.2	4.6	17.98
19	2	0.8	18.3	30.2
20	1	0.8	4.36	9.64
21	2	0.2	5.46	10.32
22	2	0	11.1	16.1
23	1	0.1	2.68	3.04

## Sheet: Mean arterial pressu after ROSC
No	Group (1: Saline, 2: Epinephrine)	1	2	3	4	5	6	7	8	9	10	11	12	13	14	15	30	45	60
1	2	99	112	111	115	112	111	108	102	100	96	94	93	93	92	92	97	97	99
2	1	110	127	132	134	135	135	131	125	122	117	114	118	115	114	112	107	108	119
3	2	129	134	139	139	136	132	120	112	108	106	105	104	103	102	101	103	106	111
4	1
5	1	78	90	97	113	136	144	147	147	148	146	144	138	135	132	125	102	101	99
6	1
7	1	120	126	124	121	124	129	128	123	121	120	123	121	120	120	117	124	121	130
8	1
9	2	155	146	147	146	141	139	132	128	121	120	119	118	118	118	119	107	91	93
10	2	131	120	105	114	117	115	113	110	106	96	90	89	89	82	82	86	95	98
11	1	145	155	147	130	126	126	117	110	107	100	100	98	98	97	96	107	121	125
12	2	105	139	140	141	148	154	154	152	149	146	139	135	135	130	127	111	115	124
13	1	112	125	122	130	137	140	157	143	136	131	126	122	119	117	115	104	112	112
14	2	123	123	134	138	134	130	124	121	118	115	113	111	110	108	109	110	106	104
15	2	136	140	143	146	147	149	145	144	143	142	139	138	138	135	135	129	133	134
16	2	139	138	140	142	145	146	144	138	130	119	113	111	108	107	107	104	106	97
17	1	105	117	119	114	125	147	144	136	136	134	134	125	123	120	120	104	109	112
18	1	125	128	127	129	132	134	133	129	126	126	126	124	126	125	127	129	129	128
19	2	218	170	148	159	166	164	164	155	149	131	127	119	116	114	110	119	125	123
20	1	161	128	110	109	107	106	121	126	111	107	92	82	73	64	60	104	106	104
21	2	147	108	91	69	158	154	143	131	116	104	99	95	93	94	95	120	122	127
22	2	124	134	133	135	133	130	124	119	114	111	108	105	104	103	105	95	97	94
23	1

## Sheet: Heart rate after ROSC
No	Group (1: Saline, 2: Epinephrine)	3	15	60
1	2	186	180	182
2	1	205	142	181
3	2	160	149	166
4	1
5	1	198	188	153
6	1
7	1	171	119	174
8	1
9	2	161	146	159
10	2	132	104	105
11	1	133	100	109
12	2	207	175	175
13	1	176	138	145
14	2	213	139	156
15	2	167	119	150
16	2	166	152	150
17	1	188	176	111
18	1	148	128	166
19	2	199	149	146
20	1	194	150	120
21	2	197	166	180
22	2	174	127	172
23	1

## Sheet: PaO2 after ROSC
No	Group (1: Saline, 2: Epinephrine)	3	15	60
1	2	290	429	407
2	1	193	333	376
3	2	263	427	454
4	1
5	1	105	201	317
6	1
7	1	191	345	492
8	1
9	2	313	461	468
10	2	190	352	420
11	1	385	517	578
12	2	194	269	363
13	1	145	306	315
14	2	323	510	530
15	2	61	122	138
16	2	97	148	222
17	1	132	175	321
18	1	397	461	514
19	2	308	393	387
20	1	470	519	519
21	2	288	548	608
22	2	409	425	517
23	1

## Sheet: PaCO2 after ROSC
No	Group (1: Saline, 2: Epinephrine)	3	15	60
1	2	52	44	47
2	1	51	46	50
3	2	51	43	45
4	1
5	1	69	63	54
6	1
7	1	60	55	51
8	1
9	2	63	57	47
10	2	66	52	53
11	1	54	48	47
12	2	70	70	65
13	1	71	65	51
14	2	55	44	48
15	2	83	70	65
16	2	59	52	53
17	1	66	55	51
18	1	49	40	49
19	2	53	47	55
20	1	46	34	47
21	2	44	46	50
22	2	55	47	44
23	1

## Sheet: PbtO2 after ROSC
No	Group (1: Saline, 2: Epinephrine)	2
1	2	51.6188	51.483	51.3885	51.2901	51.1469	51.0652	50.9388	50.8737	50.8127	50.695	50.6464	50.5573	50.4482	50.3837	50.283	50.2266	50.1543	50.0781	50.05	49.9819	49.9139	49.8699	49.81	49.7741	49.7263	49.7063	49.6785	49.6665	49.6546	49.6347	49.6466	49.6387	49.6546	49.6546	49.6785	49.6824	49.7143	49.7223	49.7542	49.7901	49.838	49.8779	49.9139	49.9699	50.0179	50.066	50.1101	50.1583
2	1	66.7434	66.7699	66.8122	66.8492	66.8598	66.9181	66.934	66.9552	67.0082	67.0241	67.0826	67.1782	67.1782	67.2474	67.3274	67.3807	67.4982	67.632	67.7071	67.8144	67.9758	68.0728	68.1754	68.3701	68.5274	68.6851	68.8541	68.9305	69.0618	69.1714	69.3471	69.5012	69.6668	69.8106	69.9658	70.1603	70.3163	70.4559	70.6407	70.8315	70.9891	71.2036	71.3677	71.5493	71.7656	71.9196	72.1485	72.3437
3	2	67.3599	67.3386	67.2906	67.2001	67.1948	67.1628	67.1522	67.1043	67.0618	67.03	66.9928	66.961	66.9027	66.8921	66.8603	66.8021	66.781	66.744	66.7228	66.6647	66.6331	66.6067	66.5962	66.5698	66.5329	66.5119	66.4961	66.4487	66.4382	66.4066	66.3436	66.3278	66.2806	66.2753	66.2281	66.2124	66.1757	66.1547	66.0815	66.0919	66.1076	66.0658	66.071	66.0083	65.956	65.9299	65.8673	65.8308
4	1
5	1	63.7833	63.4661	63.1306	62.8018	62.4747	62.1296	61.8354	61.5133	61.2122	60.9319	60.6336	60.3894	60.1175	59.8469	59.601	59.3373	59.0982	58.8506	58.6227	58.4141	58.1831	57.9806	57.7605	57.5548	57.359	57.1774	56.9873	56.8068	56.6268	56.4609	56.3177	56.1749	56.0191	55.8681	55.6998	55.5497	55.4175	55.29	55.1584	55.0315	54.9048	54.7697	54.6219	54.4875	54.3534	54.2109	54.0946	53.9786
6	1
7	1	78.333	78.3142	78.2141	78.0517	77.9894	77.8586	77.7156	77.6288	77.5358	77.4244	77.2947	77.2392	77.1283	77.0114	77.0114	76.9991	76.9806	76.9991	76.9622	76.9499	76.9622	76.9745	76.9622	76.9499	76.9806	76.9376	76.9376	76.9315	76.9192	76.9868	77.0298	77.0606	77.159	77.2022	77.1344	77.1467	77.0852	77.0175	76.9499	76.9438	76.8578	76.8456	76.821	76.7475	76.6863	76.6802	76.6557	76.6129
8	1
9	2	89.9633	90.1024	90.1244	90.2564	90.3446	90.477	90.558	90.6022	90.6022	90.6317	90.7572	90.9051	91.0459	91.1943	91.3133	91.3728	90.9125	90.3152	89.7223	89.0978	88.4495	87.8421	87.1689	86.5226	85.9303	85.3149	84.7729	84.2484	83.7274	83.2905	82.8361	82.4441	82.1003	81.7319	81.4372	81.1501	80.8966	80.6375	80.418	80.1928	80.0067	79.8146	79.6486	79.4575	79.2987	79.1718	78.982	78.8053
10	2	69.3832	68.9227	68.4708	67.9897	67.5762	67.1175	66.662	66.2149	65.7917	65.3402	64.9175	64.4976	64.0805	63.661	63.2544	62.8453	62.4488	62.0645	61.6387	61.274	60.8729	60.4504	60.064	59.6754	59.2892	58.9054	58.538	58.1635	57.7868	57.417	57.0675	56.6886	56.33	55.9779	55.6059	55.2932	54.9255	54.5513	54.2054	53.8487	53.524	53.1842	52.8295	52.4979	52.1848	51.857	51.5433	51.2395
11	1	126.532	126.433	126.466	126.51	126.565	126.588	126.61	126.676	126.731	126.753	126.864	126.908	125.544	120.954	117.906	115.936	114.747	113.746	114.308	115.089	115.867	116.612	117.262	117.896	118.545	119.106	119.68	120.207	120.725	121.236	121.708	122.14	122.733	123.127	123.65	124.005	124.468	124.923	125.402	125.741	126.169	126.488	126.864	127.23	127.564	127.977	128.224	128.516
12	2	72.564	72.4085	72.2016	72.0241	71.8869	71.6873	71.5451	71.4316	71.3126	71.1995	71.0922	70.9681	70.9006	70.8383	70.7432	70.6422	70.5862	70.5078	70.4854	70.4068	70.3067	70.2565	70.1953	70.1614	70.1118	70.0617	69.9562	69.8786	69.8121	69.7623	69.7125	69.6628	69.5634	69.4477	69.4312	69.4147	69.3652	69.2933	69.2004	69.1565	69.0962	69.0688	69.0469	69.0196	68.9649	68.9266	68.8829	68.812
13	1	50.2323	50.2363	50.2041	50.168	50.1559	50.1278	50.1117	50.0797	50.0556	49.9995	49.9635	49.9555	49.9315	49.9075	49.9035	49.8955	49.8875	49.8755	49.8755	49.8715	49.8875	49.8835	49.8875	49.9075	49.8995	49.8955	49.9035	49.9315	49.9315	49.9515	49.9315	49.8835	49.8675	49.8435	49.8475	49.8595	49.8595	49.9075	49.9515	49.9955	50.0155	50.0436	50.0596	50.1037	50.172	50.2363	50.2926	50.3813
14	2	88.9525	88.9381	88.8587	88.8299	88.7939	88.7873	88.765	88.7578	88.809	88.8155	88.8378	88.8443	88.8804	88.9525	89.0103	89.0826	89.1912	89.2346	89.3289	89.4312	89.5105	89.613	89.707	89.788	89.8683	89.9706	90.1097	90.1897	90.3225	90.3953	90.5425	90.6236	90.7639	90.8829	91.0162	91.1646	91.291	91.4466	91.6406	91.7827	91.8651	91.9925	92.1352	92.279	92.4667	92.6329	92.7616	92.9437
15	2	61.5013	61.2342	61.0069	60.79	60.5835	60.3633	60.2011	60.0107	59.8068	59.6224	59.4339	59.2459	59.0586	58.8858	58.7088	58.5231	58.3703	58.2271	58.0704	57.9371	57.795	57.6486	57.5071	57.3569	57.2115	57.0801	56.9264	56.8047	56.6562	56.5484	56.4453	56.3335	56.204	56.1104	56.017	55.8882	55.7641	55.6756	55.5299	55.4286	55.3055	55.1914	55.095	54.99	54.9027	54.8199	54.7459	54.6632
16	2	62.2012	61.7647	61.307	60.8623	60.4447	60.0203	59.6178	59.1851	58.7601	58.3427	57.9787	57.5894	57.1981	56.841	56.4545	56.0929	55.7246	55.3805	55.0516	54.681	54.343	53.9941	53.6729	53.3237	52.964	52.64	52.3012	51.981	51.6625	51.3828	51.0758	50.7746	50.483	50.1729	49.8964	49.5895	49.3277	49.0318	48.7374	48.4641	48.1998	47.9214	47.6329	47.3573	47.0908	46.8104	46.5653	46.2838
17	1	77.5544	76.9806	76.4419	75.9013	75.3888	74.886	74.4342	73.9264	73.4574	73.0265	72.5693	72.1668	71.7381	71.3235	70.9001	70.5354	70.167	69.8117	69.4418	69.1232	68.7789	68.4689	68.1603	67.864	67.5957	67.3286	67.0412	66.7605	66.4967	66.2392	66.0194	65.7742	65.5248	65.3177	65.0803	64.8695	64.6594	64.455	64.2412	64.0584	63.8964	63.6945	63.5083	63.3628	63.1926	63.0377	62.9032	62.7442
18	1	96.7415	97.0604	97.4126	97.6295	97.9276	98.1863	98.4215	98.6654	98.8774	99.049	99.262	99.5496	99.7061	99.9538	100.169	100.36	100.601	100.776	100.96	101.119	101.245	101.498	101.708	101.945	102.14	102.335	102.557	102.779	103.01	103.25	103.431	103.707	103.915	104.157	104.392	104.558	104.82	105.074	105.356	105.523	105.762	106.027	106.267	106.49	106.713	106.946	107.161	107.404
19	2	100.162	99.8308	99.5094	99.1974	98.8621	98.5443	98.2278	97.9205	97.5983	97.3174	97.0055	96.6709	96.3693	96.0452	95.7066	95.4008	95.0882	94.7459	94.4204	94.0962	93.7503	93.4823	93.177	92.8578	92.5323	92.2307	91.8927	91.6009	91.3028	90.9688	90.6583	90.349	90.0702	89.7486	89.392	89.1383	88.7989	88.54	88.2246	87.9106	87.6333	87.3145	87.0041	86.7301	86.3871	86.1431	85.8374	85.5192
20	1	109.221	108.781	108.452	108.061	107.725	107.229	106.825	106.521	106.13	105.695	105.386	104.921	104.632	104.336	103.971	103.556	103.237	102.971	102.604	102.272	101.966	101.594	101.191	100.931	100.572	100.148	99.8089	99.4958	99.1265	98.7588	98.4171	98.0525	97.6975	97.3512	97.0161	96.6179	96.2928	95.9768	95.5836	95.2001	94.9272	94.5855	94.222	93.9063	93.5459	93.1947	92.8602	92.5498
21	2	62.7964	62.1833	61.6054	61.0859	60.6236	60.198	59.7612	59.3462	58.8455	58.3396	57.9112	57.4313	56.9641	56.4961	56.0541	55.6373	55.2411	54.8431	54.4522	54.0079	53.5969	53.1803	52.7583	52.2893	51.8159	51.3422	50.8725	50.4026	49.9365	49.4347	48.9649	48.5146	47.9636	47.4295	46.8817	46.373	45.8431	45.3073	44.7768	44.2732	43.7528	43.3154	42.8395	42.3261	41.9073	41.4747	41.1068	40.7482
22	2	65.6157	64.9286	64.3099	63.6417	62.9954	62.415	61.7567	61.1343	60.5517	59.9128	59.3415	58.7756	58.1688	57.5954	57.0455	56.4648	55.8897	55.3817	54.8126	54.2749	53.7849	53.21	52.7079	52.2226	51.7002	51.1988	50.71	50.2213	49.7488	49.2843	48.8274	48.3821	47.952	47.4984	47.0675	46.6475	46.2793	45.9472	45.6614	45.3956	45.1788	44.9591	44.7659	44.5951	44.4248	44.2912	44.1723	44.0572
23	1
[truncated: 3,433 more columns]

## Sheet: MFI after ROSC
No	Group (1: Saline, 2: Epinephrine)	1	2	3	4	5	6	7	8	9	10	11	12	13	14	15	30	45	60
1	2	3	3	3	3	3	3	2.75	1	0.25	0.25	0.25	0.25	0.5	0.25	0.25	0	0.5	0
2	1	3	3	3	3	3	2.5	2.5	1.75	1.5	0.5	0.25	0.75	0.5	1	0.5	2.25	2.75	2.25
3	2	3	3	3	2.75	3	3	3	3	1.25	1.25	1.25	1	1	0.25	0.25	0.25	0.25	0.25
4	1
5	1	2	1.75	1.75	1.5	1.25	1.25	0.75	0.75	0.5	0	0	0.25	0.25	0	0	1.25	1.25	1.25
6	1
7	1	3	3	3	3	2.5	2	1.5	0.75	0.75	0.5	0.25	0	0	0	0	0	0	0
8	1
9	2	3	3	3	3	3	3	3	3	3	2	2	1	0.5	0.5	0.25	0.75	0.25	0.25
10	2	1.75	1.5	1.5	1.5	1.5	1.25	1	0.75	0.75	0	0	0	0	0	0	0.5	0.75	0.75
11	1	2.75	2.75	2.75	2.25	2.25	1.75	1.5	1.5	1.5	1	0.25	0	0	0	0	0	0	0
12	2	2.5	1.75	1.75	2.5	1.75	2	2	1.5	1.25	0.75	0.75	0.5	0.75	1	0.75	1.75	2	0.25
13	1	3	3	3	3	3	2.5	2.25	1.75	1.75	1.25	0.75	0.5	0.5	0.25	0	0	0	0
14	2	3	3	3	3	3	3	2.75	1.75	1.75	1.25	0.75	0.75	0	0.25	0	1.5		1.75
15	2	2.75	2.75	3	2.75	2.75	2.5	2.25	2	2	1.75	1.75	1.75	1.25	0.75	0.75	0.5	1.5	2.25
16	2	3	3	3	3	2.75	2.75	2.5	2.25	2	2	2	1.75	1.5	0.75	0.5	1.5	1.5	1.5
17	1	3	3	3	3	3	3	2.75	2.25	2	2	1.75	1.25	1	0.75	0.5	0.25	0.5	0.75
18	1	3	3	3	3	2.75	2.5	2.5	2	2	1.75	1.5	1.5	1.25	1	0.5	0.25	0.5	0.5
19	2	3	3	3	2.75	2.5	2.5	2.5	2.25	2	1.25	1	0.75	0.5	0.25	0.25	0.5	0.5	0.5
20	1	3	3	3	3	3	2.75	2.5	2.5	1.75	1.25	1	0.75	0.5	0.5	0.25	0.5	0.25	0.25
21	2	3	3	3	1.75	1.5	1.25	0.75	0.5	0.25	0.25	0.25	0.25	0	0	0	0.5	1	1.25
22	2	3	3	3	2.5	2	2	1.75	1.75	1	0.75	0.25	0.25	0.5	0.5	0.5	0.5	0.75	1
23	1

## Sheet: %Capillary number after ROSC
No	Group (1: Saline, 2: Epinephrine)	1	2	3	4	5	6	7	8	9	10	11	12	13	14	15	30	45	60
1	2	138.462	146.154	153.846	153.846	123.077	130.769	84.6154	84.6154	69.2308	38.4615	30.7692	23.0769	30.7692	23.0769	23.0769	7.69231	23.0769	7.69231
2	1	156.25	162.5	156.25	162.5	175	131.25	106.25	100	87.5	62.5	50	37.5	62.5	56.25	56.25	131.25	143.75	143.75
3	2	37.5	50	50	50	62.5	56.25	62.5	62.5	56.25	56.25	62.5	43.75	62.5	62.5	62.5	62.5	62.5	62.5
4	1
5	1	109.091	145.455	136.364	81.8182	63.6364	90.9091	54.5455	45.4545	45.4545	45.4545	36.3636	36.3636	45.4545	45.4545	45.4545	54.5455	63.6364	63.6364
6	1
7	1	166.667	177.778	200	200	200	200	166.667	55.5556	66.6667	22.2222	11.1111	33.3333	11.1111	11.1111	22.2222	22.2222	11.1111	33.3333
8	1
9	2	133.333	133.333	141.667	141.667	141.667	133.333	133.333	141.667	133.333	125	83.3333	33.3333	50	33.3333	50	91.6667	75	50
10	2	112.5	62.5	62.5	50	37.5	12.5	12.5	12.5	12.5	12.5	12.5	12.5	12.5	12.5	12.5	25	37.5	25
11	1	200	212.5	212.5	212.5	212.5	200	212.5	200	125	125	62.5	50	37.5	37.5	37.5	25	0	25
12	2	90.9091	81.8182	81.8182	72.7273	72.7273	72.7273	81.8182	63.6364	63.6364	54.5455	54.5455	54.5455	54.5455	45.4545	45.4545	45.4545	81.8182	63.6364
13	1	163.636	163.636	145.455	154.545	163.636	154.545	127.273	136.364	136.364	81.8182	72.7273	63.6364	63.6364	63.6364	63.6364	63.6364	54.5455	45.4545
14	2	92.3077	92.3077	84.6154	76.9231	69.2308	76.9231	69.2308	69.2308	69.2308	61.5385	61.5385	69.2308	46.1538	30.7692	30.7692	53.8462	0	69.2308
15	2	150	156.25	175	131.25	137.5	112.5	112.5	112.5	112.5	100	131.25	131.25	106.25	81.25	93.75	106.25	118.75	125
16	2	105.556	111.111	116.667	94.4444	88.8889	83.3333	83.3333	88.8889	88.8889	72.2222	72.2222	72.2222	72.2222	38.8889	38.8889	77.7778	55.5556	72.2222
17	1	175	250	262.5	237.5	250	187.5	175	137.5	150	137.5	100	75	62.5	50	50	125	125	100
18	1	145.455	163.636	145.455	145.455	136.364	154.545	127.273	127.273	109.091	81.8182	90.9091	72.7273	72.7273	63.6364	36.3636	36.3636	63.6364	54.5455
19	2	137.5	125	150	137.5	175	125	112.5	125	137.5	62.5	62.5	75	75	37.5	37.5	50	75	75
20	1	169.231	176.923	200	215.385	138.462	138.462	138.462	146.154	107.692	107.692	92.3077	84.6154	53.8462	61.5385	38.4615	61.5385	61.5385	30.7692
21	2	60	73.3333	73.3333	80	73.3333	60	60	46.6667	40	40	46.6667	40	33.3333	40	46.6667	46.6667	86.6667	86.6667
22	2	100	118.182	109.091	127.273	127.273	145.455	154.545	145.455	118.182	118.182	81.8182	72.7273	90.9091	100	81.8182	90.9091	90.9091	90.9091
23	1

## Sheet: PjvO2-PbtO2 after ROSC
No	Group (1: Saline, 2: Epinephrine)	3	15	60
1	2	43.972	56.177	47.479
2	1	-2.016	-6.133	-1.712
3	2	-0.405	5.807	15.907
4	1
5	1	-2.688	19.692	-1.638
6	1
7	1	-33.472	-18.436	-7.279
8	1
9	2	-2.376	99.513	41.62
10	2	1.609	28.124	43.222
11	1	88.859	159.607	286.775
12	2	-14.377	-5.217	-6.882
13	1	-11.538	17.293	30.255
14	2	-48.966	-18.531	19.168
15	2	-12.6	20.589	21.151
16	2	3.934	30.88	43.942
17	1	12.834	47.55	43.34
18	1	-32.401	6.991	37.369
19	2	-1.868	220.752	171.806
20	1	78.816	56.684	17.885
21	2	15.783	27.945	42.588
22	2	48.667	26.505	63.902
23	1

[truncated: 6 more sheets: Cerebral O2 EF after ROSC, Arterial lactate after ROSC, JV lactate after ROSC, PVACO2 AJDO2, JV A D Lactate, Lactate oxygen index after ROSC]
